# Supplementary material
Source: PubMed Central journal article supplement (PMC3499629)
Supplement: NIHMS380578-supplement-1_si_001.pdf [file NIHMS380578-supplement-1_si_001.pdf]

## **Identification of HIV-1 Inhibitors Targeting The Nucleocapsid Protein**

Sebastian Breuer, Max W. Chang, Jinyun Yuan, and Bruce E. Torbett\*

Department of Molecular and Experimental Medicine, The Scripps Research Institute, CA, 92037, USA

| Contents                                                                                  | Page |
|-------------------------------------------------------------------------------------------|------|
| Supplementary Figure 1 - Quality control and assay development of the FP-based HTS.       | S2   |
| Supplementary Figure 2 - Positive and negative hit selection.                             | S4   |
| Supplementary Figure 3 - Structural comparison of small-molecule NC' inhibitor compounds. | S5   |
| Supplementary Table 1 - Summary of mass spectrometry analyses.                            | S6   |
| Supplementary Table 2 - Summary of assay results in PubChem database.                     | S7   |
| References                                                                                | S8   |

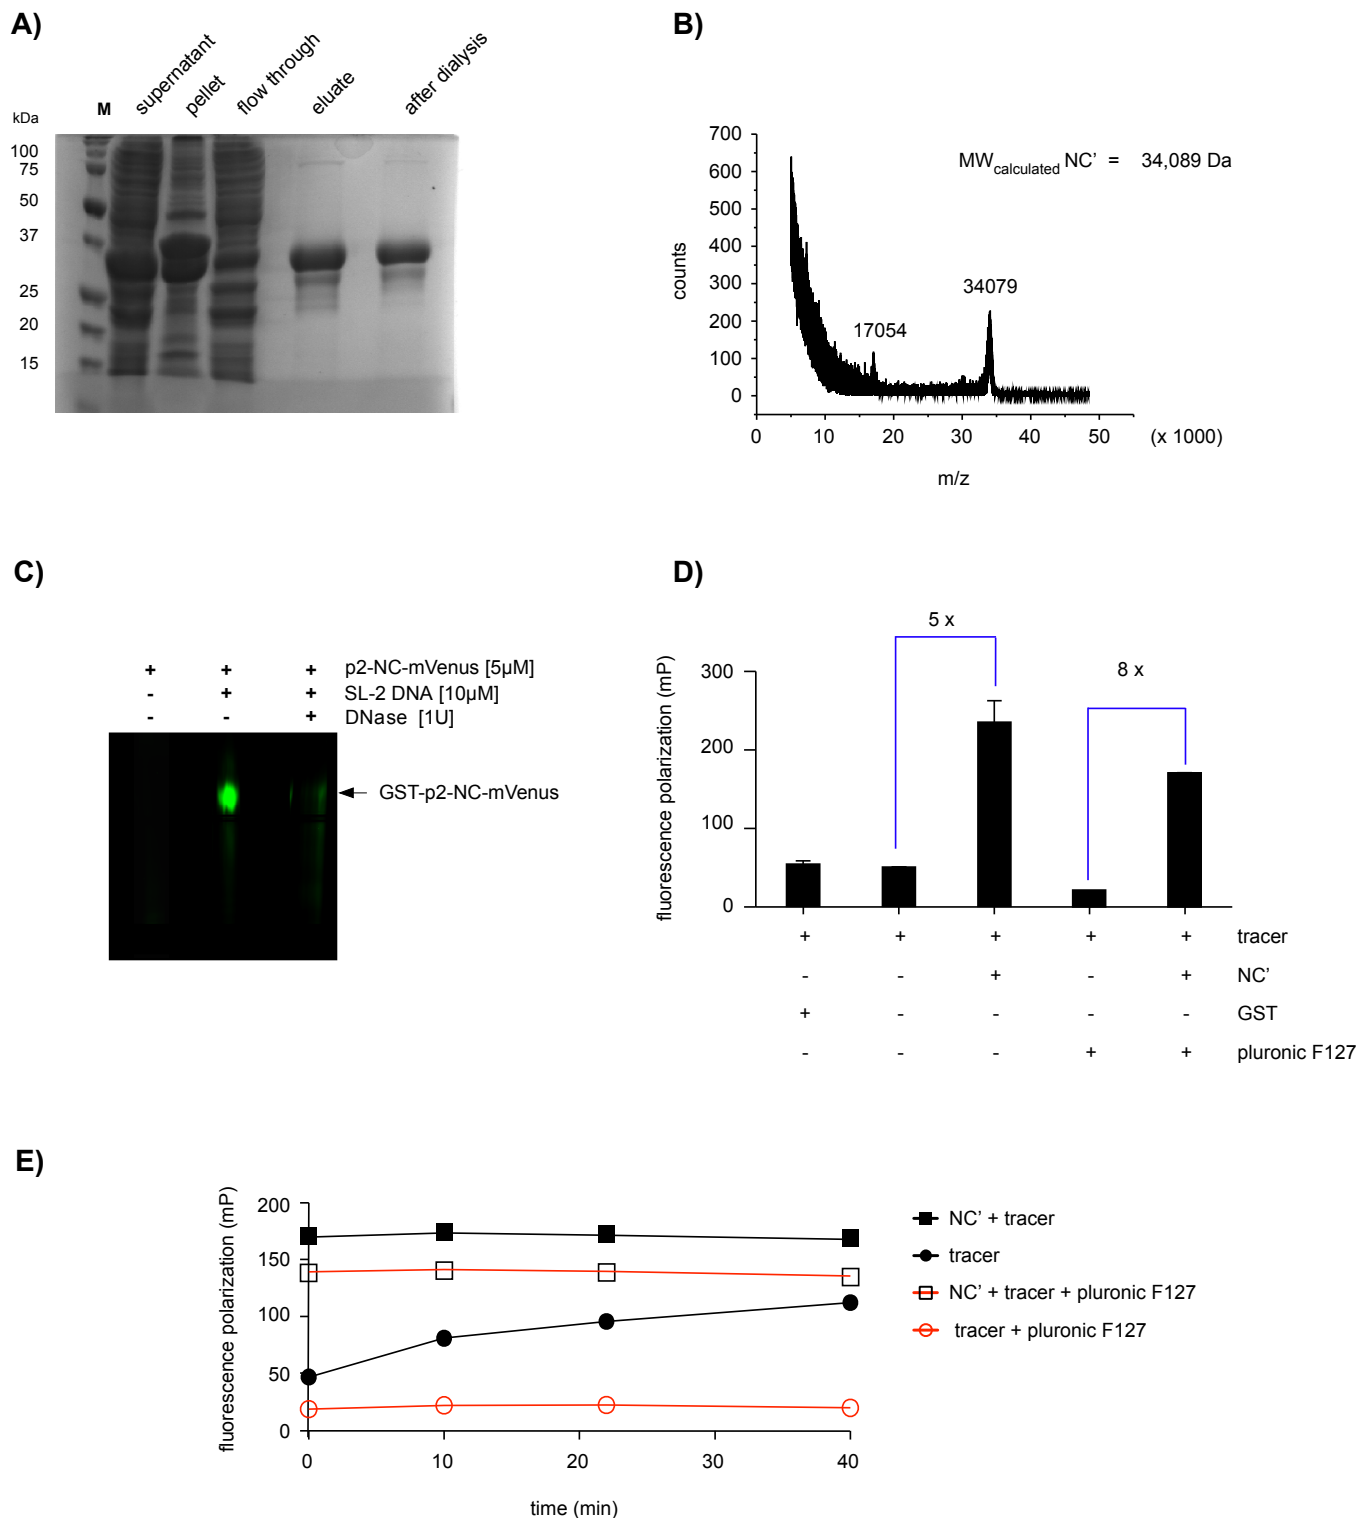

**Supplementary Figure 1.** Quality control and assay development of the FP-based HTS. (A) SDS-PAGE analysis of protein samples taken during the different stages of NC' purification using affinity chromatography ~ 90 % purity. (B) MALDI Mass spectrometry analysis of NC' confirmed the correct size of the fusion protein. (C) Native PAGE analysis of the NC'-SL-2 complex. Shown is the fluorescence scan of a Native Page gel. A fluorescent protein variation of NC', GST-p2-NC-mVenus<sup>1</sup>, was incubated with or without SL-2 DNA before analysis on a Native Page gel. The presence of SL-2 DNA stabilizes GST-p2-NC-

mVenus, which is seen as a distinct protein band in the middle gel lane. In contrast, in the absence of SL-2 DNA the GST-p2-NC-mVenus is seen only as a “smear” in the first lane of the gel. When DNase is added to the GST-p2-NC-mVenus-SL-2 complex the DNA is digested and only a smear is seen showing the same pattern as GST-p2-NC-mVenus in lane one. (D and E) Optimization of the fluorescence polarization signal for HTS use. Shown is the influence of the detergent pluronic F127 on the H/L ratio and the signal over the time.

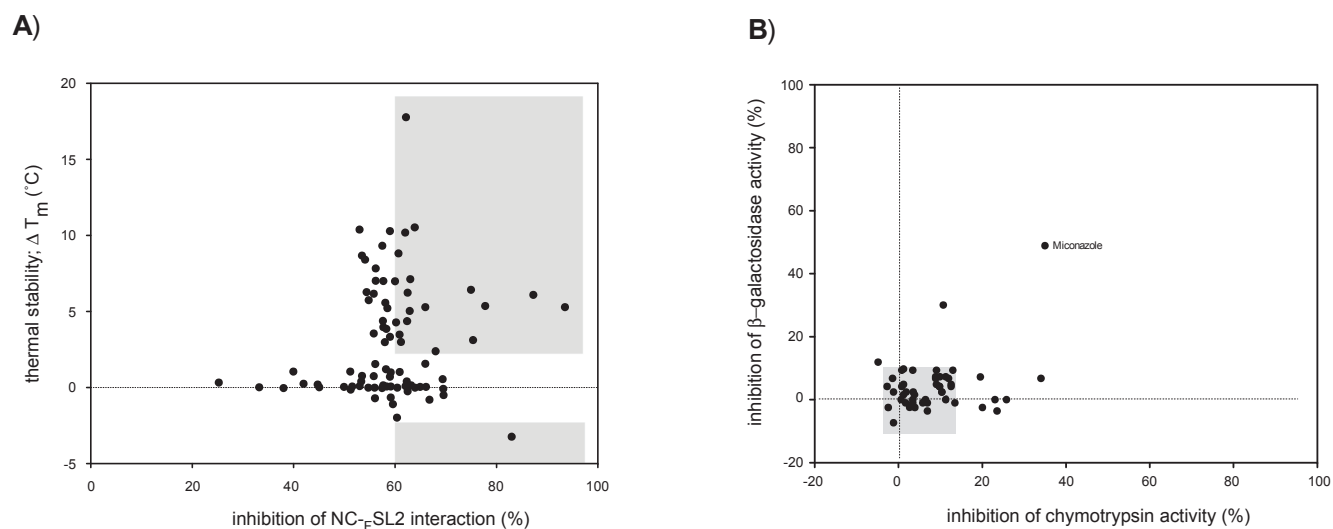

**Supplementary Figure 2.** Positive and negative hit selection. (A) Correlation of DSF-based thermal stability versus FP-based inhibition of Hits identified by NC'-FSL-2 FP HTS. Only compounds with a  $\Delta T_m \geq 2$  °C and inhibition  $\geq 60$  % (grey shading) were selected for further evaluation. (B) Correlation of beta-galactosidase inhibition versus chymotrypsin inhibition. Compounds that showed more than 15 % inhibition (grey shading) were eliminated from further consideration. The known promiscuous inhibitor miconazole was chosen as the control for promiscuous inhibition.<sup>2</sup>

compounds identified by Shvadchak et al., 2009

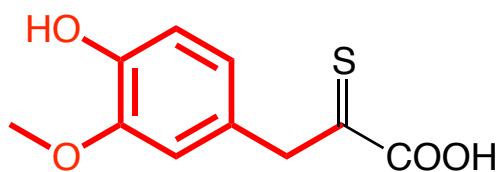

E03

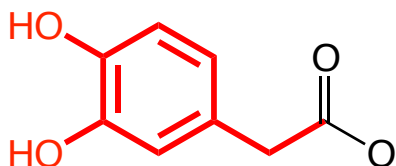

H04

compounds identified by Breuer et al., 2011

CMPD-8

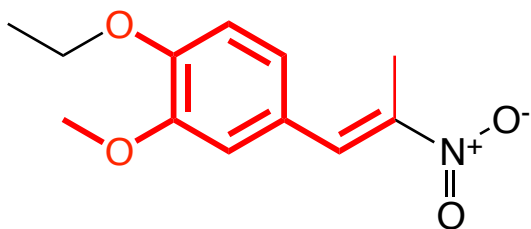

CMPD-5

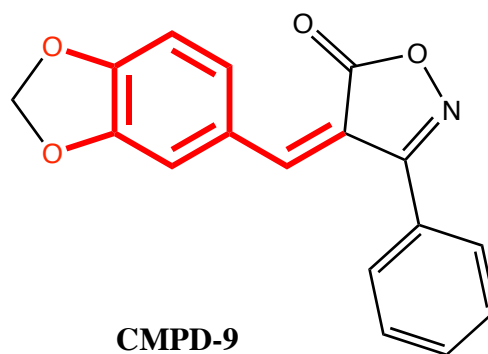

CMPD-1

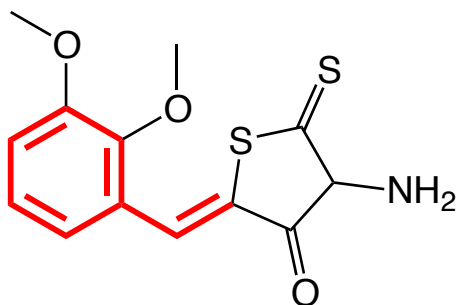

CMPD-9

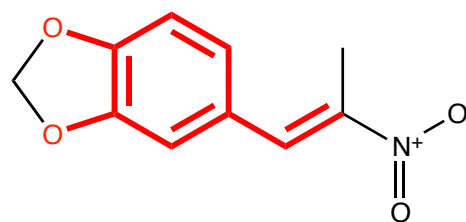

**Supplementary Figure 3.** Structural comparison of small-molecule NC' inhibitor compounds. Structural comparison between previously identified inhibitors by Shvadchak and colleagues<sup>3</sup> and the selected 5 compounds identified herein, similarities are emphasized by red for compounds **1**, **5**, **8** and **9**.

**Supplementary Table 1.** Summary of the mass spectrometry analysis of the protein – compound complexes of compounds **1, 5, 8, 9,** and **10** and NC’.

|                | theoretical mass of the<br>CMPD-protein complex | analyzed mass of the CMPD-<br>protein complex | molecular weight of the<br>CMPD |
|----------------|-------------------------------------------------|-----------------------------------------------|---------------------------------|
| <b>DMSO</b>    |                                                 | 34056                                         |                                 |
| <b>CMPD-1</b>  | 34351.38                                        | 34117.79                                      | 295.38                          |
| <b>CMPD-5</b>  | 34349.27                                        | 34143.42                                      | 293.27                          |
| <b>CMPD-8</b>  | 34293.25                                        | 34093.29                                      | 237.25                          |
| <b>CMPD-9</b>  | 34263.19                                        | 34123.91                                      | 207.19                          |
| <b>CMPD-10</b> | 34499.44                                        | 34140.23                                      | 443.44                          |

**Supplementary Table 2.** Summary of assays results for compounds **1, 5, 8, 9,** and **10** in the NCBI PubChem database<sup>a</sup>

| <b>Name</b>    | <b>Compound ID</b> | <b>Assays tested</b> | <b>Assays active</b> |
|----------------|--------------------|----------------------|----------------------|
| <b>CMPD-1</b>  | 5712383            | 14                   | 0                    |
| <b>CMPD-5</b>  | 5394836            | 7                    | 0                    |
| <b>CMPD-8</b>  | 5376876            | 8                    | 0                    |
| <b>CMPD-9</b>  | 5375839            | 78                   | 13                   |
| <b>CMPD-10</b> | 5704563            | 7                    | 1                    |

<sup>a</sup><http://pubchem.ncbi.nlm.nih.gov/>

## REFERENCES

- (1) Breuer, S.; Sepulveda, H.; Chen, Y.; Trotter, J.; Torbett, B. E. A cleavage enzyme-cytometric bead array provides biochemical profiling of resistance mutations in HIV-1 Gag and protease. *Biochem.* **2011**, *50*, 4371-4381.
- (2) Seidler, J.; McGovern, S. L.; Doman, T. N.; Shoichet, B. K. Identification and prediction of promiscuous aggregating inhibitors among known drugs. *J. Med. Chem.* **2003**, *46*, 4477-4486.
- (3) Shvadchak, V.; Sanglier, S.; Rocle, S.; Villa, P.; Haiech, J.; Hibert, M.; Van Dorselaer, A.; Mely, Y.; de Rocquigny, H. Identification by high throughput screening of small compounds inhibiting the nucleic acid destabilization activity of the HIV-1 nucleocapsid protein. *Biochimie.* **2009**, *91*, 916-923.
